# Supplementary material
Source: PubMed Central journal article supplement (PMC3794441)
Supplement: ct400598b_si_001.pdf [file ct400598b_si_001.pdf]

# Supporting Information for: Assessment of density functional methods for obtaining geometries at conical intersections in organic molecules

Michael Filatov\*

*Institut für Physikalische und Theoretische Chemie, Universität Bonn, Beringstr. 4, D-53115  
Bonn, Germany*

E-mail: mike.filatov@gmail.com

## 1 Cartesian coordinates and total energies of species obtained using the 6-31G\* basis set

Cartesian coordinates and total energies of species reported in Table 1 of the main article. The geometries at conical intersections were optimized by the SI-SA-REKS method. The ground state equilibrium geometries were optimized by the REKS and the total energies at Franck-Condon points were calculated by the SI-SA-REKS method. All calculations reported in this section employ the 6-31G\* basis set.

---

\*To whom correspondence should be addressed

## 1.1 Ethylene

Table 1: Cartesian coordinates ( $\text{\AA}$ ) of twisted-pyramidalized MECI in  $\text{C}_2\text{H}_4$ .

|   | HF        |           |           | CAM-B3LYP |           |           |
|---|-----------|-----------|-----------|-----------|-----------|-----------|
|   | X         | Y         | Z         | X         | Y         | Z         |
| C | -0.025100 | -0.474900 | 0.743800  | 0.006100  | -0.457800 | 0.732800  |
| C | -0.209100 | -0.024600 | -0.554800 | -0.214700 | -0.029800 | -0.562200 |
| H | -0.140100 | 1.012200  | -0.891100 | -0.155400 | 1.024500  | -0.925400 |
| H | 1.007300  | 0.057200  | 0.510100  | 1.031400  | 0.044100  | 0.578400  |
| H | -0.330600 | 0.144600  | 1.577900  | -0.337900 | 0.138100  | 1.586800  |
| H | -0.302300 | -0.714500 | -1.385700 | -0.329400 | -0.719000 | -1.410400 |

  

|   | M06-2X    |           |           | BH&HLYP   |           |           |
|---|-----------|-----------|-----------|-----------|-----------|-----------|
|   | X         | Y         | Z         | X         | Y         | Z         |
| C | 0.025000  | -0.462500 | 0.719100  | 0.003300  | -0.463400 | 0.726300  |
| C | -0.219700 | -0.021600 | -0.564500 | -0.215800 | -0.024800 | -0.559700 |
| H | -0.163800 | 1.024800  | -0.941600 | -0.153300 | 1.018900  | -0.919900 |
| H | 1.043900  | 0.039100  | 0.618300  | 1.020000  | 0.044900  | 0.572600  |
| H | -0.341600 | 0.137400  | 1.572600  | -0.331300 | 0.140200  | 1.577600  |
| H | -0.343800 | -0.717200 | -1.403800 | -0.322800 | -0.715700 | -1.396900 |

Table 2: Cartesian coordinates ( $\text{\AA}$ ) of ethylidene MECI in  $\text{C}_2\text{H}_4$ .

|   | HF        |           |           | CAM-B3LYP |           |           |
|---|-----------|-----------|-----------|-----------|-----------|-----------|
|   | X         | Y         | Z         | X         | Y         | Z         |
| C | 0.016700  | 0.081800  | -0.451000 | 0.013100  | 0.076800  | -0.424800 |
| C | -0.306400 | -0.107000 | 0.960200  | -0.438500 | -0.082800 | 0.950700  |
| H | 1.076600  | -0.159800 | -0.568200 | 1.082400  | -0.176000 | -0.509600 |
| H | -0.118500 | 1.105200  | -0.798900 | -0.111500 | 1.106300  | -0.797300 |
| H | -0.537000 | -0.573900 | -1.119900 | -0.527200 | -0.573500 | -1.128000 |
| H | -0.131400 | -0.346300 | 1.977800  | -0.018200 | -0.350900 | 1.909000  |

  

|   | M06-2X    |           |           | BH&HLYP   |           |           |
|---|-----------|-----------|-----------|-----------|-----------|-----------|
|   | X         | Y         | Z         | X         | Y         | Z         |
| C | -0.138800 | 0.077500  | -0.428600 | 0.016600  | 0.076800  | -0.426700 |
| C | -0.442100 | -0.052600 | 0.873200  | -0.428200 | -0.068300 | 0.949600  |
| H | 0.829100  | -0.254900 | -0.029500 | 1.078400  | -0.173300 | -0.509100 |
| H | -0.089700 | 1.121300  | -0.798000 | -0.113800 | 1.098100  | -0.796500 |
| H | -0.433500 | -0.567200 | -1.296900 | -0.526700 | -0.572400 | -1.117100 |
| H | 0.274900  | -0.324000 | 1.679800  | -0.026300 | -0.360900 | 1.899700  |

Table 3: Total energies (a.u.) of the Franck-Condon point and MECIs of  $\text{C}_2\text{H}_4$ .

|             | S <sub>0</sub> | S <sub>1</sub> | S <sub>0</sub> | S <sub>1</sub> |
|-------------|----------------|----------------|----------------|----------------|
|             | HF             |                | CAM-B3LYP      |                |
| FC          | -78.031115     | -77.676717     | -78.530333     | -78.241685     |
| tw-pyr MECI | -77.840251     | -77.840186     | -78.341711     | -78.341708     |
| eth MECI    | -77.883906     | -77.883902     | -78.378555     | -78.378549     |

  

|             | M06-2X         |                | BH&HLYP        |                |
|-------------|----------------|----------------|----------------|----------------|
|             | S <sub>0</sub> | S <sub>1</sub> | S <sub>0</sub> | S <sub>1</sub> |
| FC          | -78.535986     | -78.248638     | -78.528649     | -78.222229     |
| tw-pyr MECI | -78.345516     | -78.345512     | -78.339098     | -78.339091     |
| eth MECI    | -78.326729     | -78.324540     | -78.380168     | -78.380166     |

## 1.2 Methyliminium cation

Table 4: Cartesian coordinates ( $\text{\AA}$ ) of twisted-pyramidalized MECI in  $\text{CH}_2\text{NH}_2^+$ .

|   | HF        |           |           | CAM-B3LYP |           |           |
|---|-----------|-----------|-----------|-----------|-----------|-----------|
|   | X         | Y         | Z         | X         | Y         | Z         |
| N | -0.015700 | 0.010500  | -0.001500 | -0.014100 | 0.045300  | 0.011700  |
| C | 0.009900  | 0.027800  | 1.378800  | 0.007300  | 0.202900  | 1.364800  |
| H | 0.967400  | 0.048800  | 1.872000  | 0.951500  | -0.047700 | 1.876900  |
| H | -0.040000 | 0.859700  | -0.550400 | -0.042700 | 0.859900  | -0.619700 |
| H | -0.003300 | -0.859000 | -0.517400 | -0.003300 | -0.876800 | -0.453800 |
| H | -0.927900 | 0.009000  | 1.905700  | -0.908300 | -0.086800 | 1.907300  |
|   | M06-2X    |           |           | BH&HLYP   |           |           |
|   | X         | Y         | Z         | X         | Y         | Z         |
| N | -0.017600 | -0.034700 | 0.015700  | -0.015900 | 0.038000  | 0.013700  |
| C | 0.009200  | -0.180800 | 1.379200  | 0.007300  | 0.181300  | 1.385400  |
| H | 0.938500  | 0.165100  | 1.856800  | 0.962100  | -0.033100 | 1.863500  |
| H | -0.033900 | 0.876000  | -0.467300 | -0.041400 | 0.849300  | -0.602900 |
| H | 0.000700  | -0.856000 | -0.605200 | -0.002900 | -0.866200 | -0.466700 |
| H | -0.906500 | 0.127200  | 1.907900  | -0.918800 | -0.072600 | 1.894100  |

Table 5: Cartesian coordinates ( $\text{\AA}$ ) of methylimine MECI in  $\text{CH}_2\text{NH}_2^+$ .

|   | HF        |           |           | CAM-B3LYP |           |           |
|---|-----------|-----------|-----------|-----------|-----------|-----------|
|   | X         | Y         | Z         | X         | Y         | Z         |
| N | -0.278500 | -0.103800 | 0.905900  | -0.393200 | -0.092000 | 0.873100  |
| C | 0.048000  | 0.076800  | -0.467400 | 0.040400  | 0.059800  | -0.409000 |
| H | 1.101500  | -0.169200 | -0.546200 | 1.109800  | -0.187700 | -0.477200 |
| H | -0.143600 | 1.110600  | -0.726500 | -0.148100 | 1.099800  | -0.725700 |
| H | -0.570000 | -0.592600 | -1.053400 | -0.565500 | -0.570200 | -1.075900 |
| H | -0.157300 | -0.322000 | 1.887500  | -0.043400 | -0.309900 | 1.814700  |
|   | M06-2X    |           |           | BH&HLYP   |           |           |
|   | X         | Y         | Z         | X         | Y         | Z         |
| N | -0.369300 | -0.074200 | 0.864900  | -0.389100 | -0.087900 | 0.876200  |
| C | -0.085400 | 0.093100  | -0.389700 | 0.039200  | 0.059700  | -0.410000 |
| H | 1.093000  | -0.210500 | -0.380900 | 1.109700  | -0.184500 | -0.475500 |
| H | -0.119000 | 1.128900  | -0.765900 | -0.146000 | 1.100100  | -0.729200 |
| H | -0.534800 | -0.600200 | -1.114800 | -0.568000 | -0.572700 | -1.075200 |
| H | 0.015500  | -0.337200 | 1.786500  | -0.045700 | -0.314900 | 1.813700  |

Table 6: Total energies (a.u.) of the Franck-Condon point and MECIs of  $\text{CH}_2\text{NH}_2^+$ .

|             | S <sub>0</sub> | S <sub>1</sub> | S <sub>0</sub> | S <sub>1</sub> |
|-------------|----------------|----------------|----------------|----------------|
|             | HF             |                | CAM-B3LYP      |                |
| FC          | -94.364737     | -94.040703     | -94.906607     | -94.588916     |
| tw-pyr MECI | -94.246178     | -94.245730     | -94.759025     | -94.758209     |
| meth MECI   | -94.203907     | -94.203907     | -94.736077     | -94.736072     |
|             | M06-2X         |                | BH&HLYP        |                |
|             | S <sub>0</sub> | S <sub>1</sub> | S <sub>0</sub> | S <sub>1</sub> |
| FC          | -94.908694     | -94.579666     | -94.895292     | -94.574135     |
| tw-pyr MECI | -94.751564     | -94.750705     | -94.755529     | -94.755422     |
| meth MECI   | -94.713243     | -94.713224     | -94.730096     | -94.730019     |

## 1.3 Styrene

Table 7: Cartesian coordinates ( $\text{\AA}$ ) of MECI1 in styrene.

|   | HF        |           |           | CAM-B3LYP |           |           |
|---|-----------|-----------|-----------|-----------|-----------|-----------|
|   | X         | Y         | Z         | X         | Y         | Z         |
| C | 0.837200  | -0.168100 | 0.392700  | 0.896900  | -0.164900 | 0.408300  |
| C | 1.772200  | -0.623600 | -0.627900 | 1.777000  | -0.600400 | -0.623000 |
| C | 1.301500  | -1.443000 | -1.655500 | 1.295500  | -1.424200 | -1.652300 |
| C | 2.155800  | -1.830800 | -2.668600 | 2.146600  | -1.826800 | -2.664200 |
| C | 3.484800  | -1.429800 | -2.638200 | 3.484700  | -1.441200 | -2.637100 |
| C | 3.975000  | -0.641600 | -1.603800 | 3.979500  | -0.634200 | -1.609200 |
| C | 3.116600  | -0.236500 | -0.602200 | 3.125600  | -0.205500 | -0.610400 |
| C | -0.455100 | -0.614700 | 0.574300  | -0.421400 | -0.651800 | 0.574600  |
| H | -1.136700 | 0.168000  | 0.915600  | -1.134700 | 0.138400  | 0.876300  |
| H | 1.352500  | 0.534100  | 1.080200  | 1.389700  | 0.543300  | 1.094700  |
| H | 0.273800  | -1.735800 | -1.588000 | 0.249600  | -1.705200 | -1.584900 |
| H | 1.802400  | -2.443700 | -3.473000 | 1.772600  | -2.446300 | -3.471200 |
| H | 4.150100  | -1.731900 | -3.428100 | 4.160000  | -1.773300 | -3.419000 |
| H | 5.006800  | -0.350600 | -1.592800 | 5.024500  | -0.353700 | -1.604500 |
| H | 3.479600  | 0.375800  | 0.205000  | 3.490900  | 0.425200  | 0.191800  |
| H | -0.075300 | -0.956500 | 1.608700  | -0.195600 | -1.007900 | 1.628600  |

  

|   | M06-2X    |           |           | BH&HLYP   |           |           |
|---|-----------|-----------|-----------|-----------|-----------|-----------|
|   | X         | Y         | Z         | X         | Y         | Z         |
| C | 0.923900  | -0.153200 | 0.384600  | 0.882048  | -0.160780 | 0.401175  |
| C | 1.774000  | -0.619500 | -0.619600 | 1.778251  | -0.603064 | -0.627255 |
| C | 1.287600  | -1.448900 | -1.654100 | 1.298809  | -1.422055 | -1.652280 |
| C | 2.148600  | -1.836000 | -2.664800 | 2.151171  | -1.828716 | -2.665207 |
| C | 3.485300  | -1.432200 | -2.635500 | 3.483747  | -1.439772 | -2.635226 |
| C | 3.971500  | -0.640400 | -1.598300 | 3.977015  | -0.642940 | -1.606264 |
| C | 3.123300  | -0.229000 | -0.593200 | 3.123828  | -0.218428 | -0.611414 |
| C | -0.410300 | -0.631400 | 0.571700  | -0.425567 | -0.646490 | 0.575038  |
| H | -1.137100 | 0.150600  | 0.908600  | -1.129941 | 0.139181  | 0.879659  |
| H | 1.343400  | 0.552200  | 1.098400  | 1.394191  | 0.538988  | 1.086184  |
| H | 0.241600  | -1.740200 | -1.636500 | 0.258649  | -1.699490 | -1.564131 |
| H | 1.760800  | -2.449400 | -3.482700 | 1.788762  | -2.447617 | -3.471336 |
| H | 4.168800  | -1.751200 | -3.423900 | 4.148727  | -1.756473 | -3.421824 |
| H | 5.007500  | -0.339400 | -1.591900 | 5.014602  | -0.353430 | -1.597675 |
| H | 3.472100  | 0.406900  | 0.218300  | 3.484372  | 0.415728  | 0.184509  |
| H | -0.119500 | -0.967600 | 1.617200  | -0.187296 | -1.003182 | 1.624295  |

Table 8: Cartesian coordinates ( $\text{\AA}$ ) of MECI2 in styrene.

|   | HF        |           |           | CAM-B3LYP |           |           |
|---|-----------|-----------|-----------|-----------|-----------|-----------|
|   | X         | Y         | Z         | X         | Y         | Z         |
| C | 0.856700  | -0.202000 | 0.407100  | 0.901300  | -0.189400 | 0.418600  |
| C | 1.742400  | -0.584100 | -0.641500 | 1.763000  | -0.594600 | -0.612200 |
| C | 1.298300  | -1.413800 | -1.686300 | 1.296700  | -1.407900 | -1.663700 |
| C | 2.177400  | -1.840600 | -2.665000 | 2.162700  | -1.838800 | -2.651100 |
| C | 3.508200  | -1.453200 | -2.644900 | 3.495100  | -1.448700 | -2.642800 |
| C | 3.957100  | -0.642100 | -1.612300 | 3.964900  | -0.639300 | -1.618300 |
| C | 3.096200  | -0.212600 | -0.619000 | 3.117300  | -0.227900 | -0.610100 |
| C | -0.353800 | 0.357600  | 0.581600  | -0.366000 | 0.365100  | 0.544400  |
| H | -0.755100 | 1.129100  | -0.071200 | -0.793800 | 1.129000  | -0.106400 |
| H | 1.086300  | 0.923500  | 0.763100  | 1.115000  | 0.918900  | 0.777200  |
| H | 0.264800  | -1.720200 | -1.709700 | 0.265000  | -1.707800 | -1.673600 |
| H | 1.817000  | -2.482000 | -3.453100 | 1.791300  | -2.469400 | -3.437200 |
| H | 4.177300  | -1.781800 | -3.418000 | 4.162500  | -1.768600 | -3.425500 |
| H | 4.998100  | -0.347500 | -1.576700 | 4.998600  | -0.333800 | -1.607100 |
| H | 3.455700  | 0.401400  | 0.183200  | 3.492500  | 0.382100  | 0.202100  |
| H | -0.982300 | 0.157100  | 1.440400  | -1.021400 | 0.120000  | 1.383600  |

  

|   | M06-2X    |           |           | BH&HLYP   |           |           |
|---|-----------|-----------|-----------|-----------|-----------|-----------|
|   | X         | Y         | Z         | X         | Y         | Z         |
| C | 0.935500  | -0.154600 | 0.421000  | 0.871200  | -0.188700 | 0.420500  |
| C | 1.755500  | -0.590200 | -0.615700 | 1.768700  | -0.599600 | -0.612700 |
| C | 1.291100  | -1.424000 | -1.656500 | 1.300100  | -1.408400 | -1.659900 |
| C | 2.155300  | -1.834400 | -2.657800 | 2.162400  | -1.833300 | -2.651400 |
| C | 3.492800  | -1.445900 | -2.649800 | 3.494400  | -1.444400 | -2.647100 |
| C | 3.965700  | -0.640800 | -1.615100 | 3.965200  | -0.639400 | -1.618500 |
| C | 3.111900  | -0.226700 | -0.611000 | 3.122100  | -0.229900 | -0.608100 |
| C | -0.382200 | 0.361200  | 0.535400  | -0.361700 | 0.362300  | 0.549300  |
| H | -0.789800 | 1.119500  | -0.125100 | -0.791900 | 1.129800  | -0.107900 |
| H | 1.156100  | 0.936700  | 0.813700  | 1.117100  | 0.920300  | 0.775300  |
| H | 0.256100  | -1.733400 | -1.671500 | 0.266300  | -1.708300 | -1.673000 |
| H | 1.788400  | -2.476700 | -3.449300 | 1.792100  | -2.471300 | -3.436500 |
| H | 4.160400  | -1.761000 | -3.437300 | 4.163300  | -1.770700 | -3.426100 |
| H | 5.004400  | -0.333900 | -1.590400 | 5.000000  | -0.334500 | -1.609100 |
| H | 3.479400  | 0.380700  | 0.209200  | 3.494400  | 0.382900  | 0.200000  |
| H | -1.036100 | 0.112400  | 1.378200  | -1.019100 | 0.122000  | 1.383000  |

Table 9: Total energies (a.u.) of the Franck-Condon point and MECIs of styrene.

|       | S <sub>0</sub> | S <sub>1</sub> | S <sub>0</sub> | S <sub>1</sub> |
|-------|----------------|----------------|----------------|----------------|
|       | HF             |                | CAM-B3LYP      |                |
| FC    | -307.582655    | -307.343116    | -309.454902    | -309.263606    |
| MECI1 | -307.415630    | -307.415629    | -309.293249    | -309.293246    |
| MECI2 | -307.393142    | -307.393127    | -309.271795    | -309.271785    |

  

|       | M06-2X         |                | BH&HLYP        |                |
|-------|----------------|----------------|----------------|----------------|
|       | S <sub>0</sub> | S <sub>1</sub> | S <sub>0</sub> | S <sub>1</sub> |
| FC    | -309.498779    | -309.311239    | -309.448569    | -309.249950    |
| MECI1 | -309.330352    | -309.330351    | -309.286196    | -309.286195    |
| MECI2 | -309.314869    | -309.314864    | -309.263292    | -309.263291    |

## 1.4 Stilbene

Table 10: Cartesian coordinates ( $\text{\AA}$ ) of MECI in stilbene.

|   | HF        |           |           | CAM-B3LYP |           |           |
|---|-----------|-----------|-----------|-----------|-----------|-----------|
|   | X         | Y         | Z         | X         | Y         | Z         |
| C | 0.766100  | -0.143400 | 0.405600  | 0.883600  | -0.153800 | 0.391400  |
| C | 1.733300  | -0.608200 | -0.634600 | 1.736400  | -0.658500 | -0.613700 |
| C | 1.266600  | -1.394400 | -1.689900 | 1.271100  | -1.438500 | -1.683400 |
| C | 2.123400  | -1.769800 | -2.704800 | 2.137500  | -1.789100 | -2.696600 |
| C | 3.458000  | -1.384500 | -2.657200 | 3.460300  | -1.337500 | -2.660500 |
| C | 3.950100  | -0.617200 | -1.605400 | 3.922700  | -0.592600 | -1.605100 |
| C | 3.079900  | -0.224600 | -0.599200 | 3.069200  | -0.248300 | -0.587600 |
| C | -0.496600 | -0.598500 | 0.576400  | -0.490400 | -0.563500 | 0.559300  |
| C | -1.589200 | 0.259800  | 1.026000  | -1.598300 | 0.262700  | 1.028000  |
| C | -1.855300 | 1.498900  | 0.423000  | -1.882500 | 1.490500  | 0.412800  |
| C | -2.946000 | 2.264200  | 0.807500  | -2.953700 | 2.271300  | 0.803000  |
| C | -3.807600 | 1.835800  | 1.803700  | -3.803100 | 1.856000  | 1.813800  |
| C | -3.549600 | 0.614000  | 2.410500  | -3.567600 | 0.627200  | 2.420500  |
| C | -2.472900 | -0.156400 | 2.032400  | -2.495400 | -0.159800 | 2.030800  |
| H | 1.343100  | 0.502500  | 1.114700  | 1.354800  | 0.472000  | 1.147100  |
| H | 0.231000  | -1.674800 | -1.632700 | 0.240900  | -1.751900 | -1.698800 |
| H | 1.768400  | -2.363700 | -3.526200 | 1.784700  | -2.387900 | -3.522000 |
| H | 4.124400  | -1.684900 | -3.446200 | 4.133300  | -1.647700 | -3.455200 |
| H | 4.987300  | -0.333500 | -1.580300 | 4.951300  | -0.269300 | -1.588000 |
| H | 3.453500  | 0.378800  | 0.211200  | 3.417400  | 0.359200  | 0.232000  |
| H | -0.054500 | -1.025600 | 1.546400  | -0.017700 | -1.023700 | 1.509500  |
| H | -1.225800 | 1.851300  | -0.378800 | -1.236100 | 1.833300  | -0.382000 |
| H | -3.119400 | 3.208400  | 0.316500  | -3.124900 | 3.219100  | 0.314500  |
| H | -4.657300 | 2.426200  | 2.095300  | -4.634700 | 2.469200  | 2.120700  |
| H | -4.205800 | 0.250100  | 3.182300  | -4.222300 | 0.278300  | 3.203500  |
| H | -2.305300 | -1.110300 | 2.504300  | -2.336900 | -1.116700 | 2.506200  |

  

|   | M06-2X    |           |           | BH&HLYP   |           |           |
|---|-----------|-----------|-----------|-----------|-----------|-----------|
|   | X         | Y         | Z         | X         | Y         | Z         |
| C | 0.895200  | -0.122000 | 0.364100  | 0.874800  | -0.150700 | 0.392200  |
| C | 1.741400  | -0.653400 | -0.615700 | 1.738200  | -0.655000 | -0.613800 |
| C | 1.271300  | -1.438300 | -1.683200 | 1.271400  | -1.436000 | -1.684100 |
| C | 2.136300  | -1.791600 | -2.694900 | 2.130400  | -1.791200 | -2.695600 |
| C | 3.460000  | -1.369000 | -2.662500 | 3.454800  | -1.363700 | -2.659000 |
| C | 3.931000  | -0.602200 | -1.603600 | 3.925500  | -0.591800 | -1.604800 |
| C | 3.082600  | -0.238700 | -0.585900 | 3.071500  | -0.243100 | -0.587300 |
| C | -0.509800 | -0.563800 | 0.559900  | -0.489900 | -0.563900 | 0.558600  |
| C | -1.599400 | 0.262000  | 1.029100  | -1.598100 | 0.262600  | 1.027500  |
| C | -1.883500 | 1.490400  | 0.415100  | -1.878400 | 1.493400  | 0.412900  |
| C | -2.954800 | 2.270900  | 0.805800  | -2.952800 | 2.272600  | 0.803200  |
| C | -3.804400 | 1.854600  | 1.815900  | -3.802200 | 1.854800  | 1.815300  |
| C | -3.569000 | 0.625200  | 2.421500  | -3.563700 | 0.625700  | 2.419800  |
| C | -2.496700 | -0.161500 | 2.031200  | -2.495500 | -0.160800 | 2.029900  |
| H | 1.353700  | 0.471300  | 1.149200  | 1.354700  | 0.473000  | 1.147500  |
| H | 0.240500  | -1.749900 | -1.699200 | 0.242300  | -1.749800 | -1.699900 |
| H | 1.784700  | -2.384100 | -3.522600 | 1.786800  | -2.384200 | -3.523100 |
| H | 4.133300  | -1.644100 | -3.454500 | 4.135100  | -1.643200 | -3.455300 |
| H | 4.950800  | -0.267400 | -1.585900 | 4.952000  | -0.265500 | -1.587300 |
| H | 3.416500  | 0.359200  | 0.234300  | 3.417700  | 0.361500  | 0.232700  |
| H | -0.018900 | -1.024800 | 1.509700  | -0.017400 | -1.023400 | 1.508700  |
| H | -1.236900 | 1.834100  | -0.379200 | -1.236300 | 1.834200  | -0.381500 |
| H | -3.125800 | 3.219000  | 0.318200  | -3.125800 | 3.218700  | 0.315300  |
| H | -4.636100 | 2.467500  | 2.123400  | -4.635800 | 2.467400  | 2.120700  |
| H | -4.224000 | 0.275500  | 3.204100  | -4.222800 | 0.276200  | 3.202500  |
| H | -2.338300 | -1.118800 | 2.505900  | -2.336700 | -1.117800 | 2.504900  |

Table 11: Total energies (a.u.) of the Franck-Condon points and MECI of stilbene.

|          | S <sub>0</sub> | S <sub>1</sub> | S <sub>0</sub> | S <sub>1</sub> |
|----------|----------------|----------------|----------------|----------------|
|          | HF             |                | CAM-B3LYP      |                |
| trans-FC | -537.137837    | -536.927428    | -540.380313    | -540.222826    |
| cis-FC   | -537.131724    | -536.909037    | -540.373610    | -540.206921    |
| MECI     | -536.966146    | -536.966112    | -540.215931    | -540.215925    |
|          | M06-2X         |                | BH&HLYP        |                |
| trans-FC | -540.462963    | -540.307726    | -540.369326    | -540.208889    |
| cis-FC   | -540.458135    | -540.295896    | -540.362270    | -540.191193    |
| MECI     | -540.293796    | -540.293789    | -540.205066    | -540.205049    |

## 1.5 Protonated Schiff base, PSB3

Table 12: Cartesian coordinates ( $\text{\AA}$ ) of MECI in PSB3.

|   | HF        |           |           | CAM-B3LYP |           |           |
|---|-----------|-----------|-----------|-----------|-----------|-----------|
|   | X         | Y         | Z         | X         | Y         | Z         |
| C | -2.843500 | -0.901100 | 0.810600  | -2.849300 | -0.907500 | 0.809900  |
| C | -1.502900 | -0.886600 | 0.826300  | -1.500000 | -0.856600 | 0.786800  |
| C | -0.725200 | 0.000600  | 0.026500  | -0.757200 | 0.068000  | 0.039000  |
| C | 0.730800  | -0.035100 | 0.002400  | 0.687300  | -0.042000 | 0.005800  |
| C | 1.516800  | 0.803200  | 0.847700  | 1.527600  | 0.823600  | 0.870500  |
| N | 2.805500  | 0.796200  | 0.853400  | 2.811200  | 0.784100  | 0.865400  |
| H | 1.270400  | -0.697500 | -0.654900 | 1.260200  | -0.738600 | -0.627000 |
| H | -1.205200 | 0.648800  | -0.688100 | -1.185300 | 0.649300  | -0.765900 |
| H | 1.025000  | 1.479900  | 1.523300  | 1.028200  | 1.526200  | 1.539600  |
| H | -0.983000 | -1.572000 | 1.474900  | -0.963800 | -1.552600 | 1.432300  |
| H | 3.330500  | 1.393300  | 1.461500  | 3.366900  | 1.390600  | 1.472700  |
| H | 3.339000  | 0.194800  | 0.252500  | 3.339300  | 0.150900  | 0.254700  |
| H | -3.405400 | -1.584800 | 1.418400  | -3.340200 | -1.638100 | 1.437500  |
| H | -3.405200 | -0.243000 | 0.167800  | -3.477500 | -0.261000 | 0.201100  |

  

|   | M06-2X    |           |           | BH&HLYP   |           |           |
|---|-----------|-----------|-----------|-----------|-----------|-----------|
|   | X         | Y         | Z         | X         | Y         | Z         |
| C | -2.868600 | -0.912800 | 0.817000  | -2.854200 | -0.909900 | 0.821700  |
| C | -1.508000 | -0.876700 | 0.792100  | -1.506600 | -0.870600 | 0.782600  |
| C | -0.728100 | 0.037300  | 0.051100  | -0.727400 | 0.025700  | 0.066500  |
| C | 0.723600  | -0.037100 | -0.016600 | 0.707100  | -0.038800 | -0.007300 |
| C | 1.552700  | 0.842300  | 0.859100  | 1.515100  | 0.817700  | 0.863200  |
| N | 2.795100  | 0.789300  | 0.868800  | 2.796700  | 0.789400  | 0.858000  |
| H | 1.299600  | -0.705500 | -0.671300 | 1.281900  | -0.691600 | -0.664800 |
| H | -1.150300 | 0.633400  | -0.751700 | -1.144500 | 0.648700  | -0.732100 |
| H | 0.990600  | 1.530100  | 1.516600  | 1.014100  | 1.505300  | 1.527700  |
| H | -0.978200 | -1.591400 | 1.433700  | -0.988400 | -1.560400 | 1.437200  |
| H | 3.354300  | 1.384500  | 1.486700  | 3.342800  | 1.379400  | 1.472900  |
| H | 3.320100  | 0.152600  | 0.260400  | 3.319500  | 0.168000  | 0.253300  |
| H | -3.379500 | -1.610800 | 1.459200  | -3.374800 | -1.589700 | 1.466100  |
| H | -3.475800 | -0.238900 | 0.217300  | -3.433800 | -0.276800 | 0.177400  |

Table 13: Total energies (a.u.) of the Franck-Condon points and MECI of PSB3.

|          | S <sub>0</sub> | S <sub>1</sub> | S <sub>0</sub> | S <sub>1</sub> |
|----------|----------------|----------------|----------------|----------------|
|          | HF             |                | CAM-B3LYP      |                |
| trans-FC | -248.189000    | -248.012309    | -249.667850    | -249.516445    |
| cis-FC   | -248.183100    | -248.010690    | -249.662935    | -249.514426    |
| MECI     | -248.098025    | -248.098007    | -249.555747    | -249.555667    |

  

|          | M06-2X         |                | BH&HLYP        |                |
|----------|----------------|----------------|----------------|----------------|
|          | S <sub>0</sub> | S <sub>1</sub> | S <sub>0</sub> | S <sub>1</sub> |
| trans-FC | -249.687607    | -249.533192    | -249.659245    | -249.503585    |
| cis-FC   | -249.682897    | -249.530867    | -249.654007    | -249.501458    |
| MECI     | -249.564518    | -249.564432    | -249.548551    | -249.548508    |



## 1.6 HBI anion

Table 14: Cartesian coordinates ( $\text{\AA}$ ) of  $\text{MECI}_{Ph}$  in HBI anion.

|   | HF        |           |           | CAM-B3LYP |           |           |
|---|-----------|-----------|-----------|-----------|-----------|-----------|
|   | X         | Y         | Z         | X         | Y         | Z         |
| N | -0.739464 | 0.266736  | 3.537723  | -0.701300 | 0.361000  | 3.540200  |
| N | -0.309361 | 1.007690  | 1.499933  | -0.208200 | 0.983500  | 1.474800  |
| H | -1.023882 | 0.238377  | 4.479172  | -0.954500 | 0.381000  | 4.513100  |
| H | -1.275778 | 2.268700  | 2.840841  | -1.257400 | 2.322300  | 2.789500  |
| H | 0.895256  | -2.102895 | 0.677710  | 0.812500  | -2.114000 | 0.442900  |
| H | 2.301623  | 0.512759  | -1.136059 | 2.306100  | 0.477600  | -1.125400 |
| H | 1.654482  | 1.231159  | -3.431305 | 1.632500  | 1.315800  | -3.382700 |
| H | -2.157323 | -0.629246 | -2.941418 | -2.126200 | -0.702000 | -2.957300 |
| H | -1.517895 | -1.334600 | -0.641659 | -1.475800 | -1.326100 | -0.574100 |
| C | -0.781005 | 1.340385  | 2.627105  | -0.761400 | 1.378900  | 2.613000  |
| C | 0.230744  | -0.286533 | 1.659993  | 0.247600  | -0.321600 | 1.657800  |
| C | -0.014105 | -0.742661 | 2.942000  | -0.041200 | -0.749400 | 2.961000  |
| C | 0.933800  | -1.009100 | 0.570800  | 0.958800  | -1.032100 | 0.573000  |
| C | 0.462839  | -0.530033 | -0.748756 | 0.483600  | -0.504200 | -0.729500 |
| C | 1.341539  | 0.272100  | -1.556300 | 1.344700  | 0.259200  | -1.542300 |
| C | 0.997200  | 0.676800  | -2.792000 | 0.990800  | 0.703300  | -2.775000 |
| C | -0.304000 | 0.369800  | -3.362800 | -0.289500 | 0.350800  | -3.339400 |
| C | -1.192400 | -0.396000 | -2.523500 | -1.187100 | -0.414900 | -2.501500 |
| C | -0.834000 | -0.790900 | -1.268000 | -0.826500 | -0.784500 | -1.242300 |
| O | 0.179100  | -1.792000 | 3.562300  | 0.152400  | -1.819200 | 3.595800  |
| O | -0.576700 | 0.669000  | -4.513600 | -0.616800 | 0.674800  | -4.486200 |

  

|   | M06-2X    |           |           | BH&HLYP   |           |           |
|---|-----------|-----------|-----------|-----------|-----------|-----------|
|   | X         | Y         | Z         | X         | Y         | Z         |
| N | -0.551071 | 0.458226  | 3.551593  | -0.668547 | 0.372949  | 3.522406  |
| N | -0.281721 | 0.965224  | 1.445493  | -0.242636 | 0.990664  | 1.475466  |
| H | -0.862712 | 0.469339  | 4.512328  | -0.968516 | 0.390639  | 4.478737  |
| H | -1.178633 | 2.338353  | 2.833049  | -1.273624 | 2.299057  | 2.797124  |
| H | 0.765800  | -2.085700 | 0.414239  | 0.805541  | -2.081806 | 0.637036  |
| H | 2.298339  | 0.485614  | -1.088567 | 2.298394  | 0.505248  | -1.147056 |
| H | 1.632321  | 1.333000  | -3.382433 | 1.674226  | 1.281888  | -3.427079 |
| H | -2.105253 | -0.750653 | -2.989647 | -2.132369 | -0.641370 | -2.945212 |
| H | -1.512500 | -1.343400 | -0.604500 | -1.513315 | -1.338300 | -0.634574 |
| C | -0.787800 | 1.360571  | 2.615797  | -0.780289 | 1.358554  | 2.610560  |
| C | 0.199037  | -0.298900 | 1.652000  | 0.213405  | -0.295689 | 1.639532  |
| C | -0.030200 | -0.740400 | 2.961300  | -0.027158 | -0.747246 | 2.948357  |
| C | 0.938600  | -1.006400 | 0.588600  | 0.940800  | -1.008354 | 0.572562  |
| C | 0.468600  | -0.510700 | -0.724500 | 0.470027  | -0.515354 | -0.741000 |
| C | 1.358700  | 0.273400  | -1.567000 | 1.343600  | 0.279000  | -1.577023 |
| C | 1.002400  | 0.688300  | -2.772500 | 1.002059  | 0.715271  | -2.795636 |
| C | -0.276000 | 0.334300  | -3.316900 | -0.296213 | 0.381188  | -3.340170 |
| C | -1.187400 | -0.421200 | -2.508300 | -1.172006 | -0.409507 | -2.515373 |
| C | -0.837700 | -0.797800 | -1.251200 | -0.835423 | -0.795154 | -1.264250 |
| O | 0.185500  | -1.802900 | 3.591300  | 0.186742  | -1.810700 | 3.575100  |
| O | -0.583700 | 0.678900  | -4.503600 | -0.583599 | 0.680707  | -4.511389 |

Table 15: Cartesian coordinates ( $\text{\AA}$ ) of  $\text{MECI}_{Im}$  in HBI anion.

|   | HF        |           |           | CAM-B3LYP |           |           |
|---|-----------|-----------|-----------|-----------|-----------|-----------|
|   | X         | Y         | Z         | X         | Y         | Z         |
| N | -1.299238 | 0.339759  | 3.240790  | -1.287922 | 0.402073  | 3.278159  |
| N | 0.800305  | 0.626897  | 2.525228  | 0.830948  | 0.572276  | 2.493404  |
| H | -2.122071 | 0.455012  | 3.781467  | -2.110952 | 0.566254  | 3.836826  |
| H | 0.038099  | 1.754079  | 4.105047  | 0.099410  | 1.787742  | 4.093722  |
| H | 1.099560  | -2.022827 | 0.687073  | 1.045972  | -2.035327 | 0.707600  |
| H | 0.959670  | -2.403094 | -1.714407 | 0.967665  | -2.420451 | -1.711049 |
| H | 0.409491  | -1.703268 | -3.978660 | 0.419112  | -1.695268 | -3.998581 |
| H | -0.603061 | 2.185834  | -2.517401 | -0.626991 | 2.185234  | -2.528401 |
| H | -0.050405 | 1.487575  | -0.271779 | -0.029165 | 1.493660  | -0.254918 |
| C | -0.124282 | 0.991103  | 3.362959  | -0.092378 | 1.003102  | 3.369336  |
| C | 0.246407  | -0.334347 | 1.718648  | 0.255259  | -0.339442 | 1.711209  |
| C | -1.154938 | -0.569372 | 2.192501  | -1.154176 | -0.542918 | 2.203256  |
| C | 0.867944  | -0.978686 | 0.560437  | 0.885655  | -0.974423 | 0.556495  |
| C | 0.492588  | -0.535990 | -0.764801 | 0.493550  | -0.542072 | -0.762627 |
| C | 0.616064  | -1.392546 | -1.885217 | 0.611174  | -1.404178 | -1.882954 |
| C | 0.310590  | -1.008605 | -3.161018 | 0.305053  | -1.004285 | -3.164619 |
| C | -0.152080 | 0.319585  | -3.489360 | -0.176530 | 0.306889  | -3.484531 |
| C | -0.266771 | 1.178200  | -2.340575 | -0.279624 | 1.170533  | -2.343243 |
| C | 0.040777  | 0.768040  | -1.070449 | 0.043965  | 0.763826  | -1.062609 |
| O | -1.995962 | -1.338632 | 1.847477  | -2.000929 | -1.330200 | 1.877880  |
| O | -0.422291 | 0.682882  | -4.647042 | -0.482761 | 0.669331  | -4.655949 |

  

|   | M06-2X    |           |           | BH&HLYP   |           |           |
|---|-----------|-----------|-----------|-----------|-----------|-----------|
|   | X         | Y         | Z         | X         | Y         | Z         |
| N | -1.204597 | 0.489064  | 3.298271  | -1.295805 | 0.397677  | 3.246615  |
| N | 0.812950  | 0.558973  | 2.503115  | 0.810632  | 0.575651  | 2.493733  |
| H | -2.068901 | 0.726013  | 3.790986  | -2.115205 | 0.537682  | 3.804203  |
| H | 0.149926  | 1.793804  | 4.106972  | 0.082341  | 1.772595  | 4.076561  |
| H | 1.054306  | -2.042393 | 0.659729  | 1.046801  | -2.025598 | 0.701371  |
| H | 0.966519  | -2.414797 | -1.710006 | 0.961747  | -2.403489 | -1.710006 |
| H | 0.393884  | -1.712279 | -3.986453 | 0.406472  | -1.706008 | -3.979371 |
| H | -0.621482 | 2.197001  | -2.519316 | -0.617005 | 2.177215  | -2.523692 |
| H | -0.034184 | 1.491188  | -0.254934 | -0.018788 | 1.492185  | -0.267427 |
| C | -0.097892 | 1.018302  | 3.398559  | -0.102597 | 1.000722  | 3.351744  |
| C | 0.247536  | -0.338187 | 1.718474  | 0.243054  | -0.341700 | 1.710850  |
| C | -1.157098 | -0.553669 | 2.193144  | -1.155350 | -0.548029 | 2.198789  |
| C | 0.885622  | -0.972496 | 0.554024  | 0.883311  | -0.969317 | 0.557519  |
| C | 0.494677  | -0.538084 | -0.765028 | 0.492253  | -0.538589 | -0.763747 |
| C | 0.621323  | -1.395777 | -1.882804 | 0.609226  | -1.394012 | -1.882551 |
| C | 0.304979  | -1.004285 | -3.164584 | 0.302124  | -1.007155 | -3.161728 |
| C | -0.164026 | 0.314880  | -3.485871 | -0.181333 | 0.305903  | -3.486463 |
| C | -0.271497 | 1.182820  | -2.344628 | -0.280635 | 1.166843  | -2.343438 |
| C | 0.048695  | 0.768756  | -1.068760 | 0.053315  | 0.769557  | -1.069520 |
| O | -1.986677 | -1.332173 | 1.855749  | -1.994467 | -1.333938 | 1.869181  |
| O | -0.467564 | 0.675800  | -4.651297 | -0.478928 | 0.667023  | -4.653616 |

Table 16: Total energies (a.u.) of the Franck-Condon point and MECIs of HBI anion.

|                    | S <sub>0</sub> | S <sub>1</sub> | S <sub>0</sub> | S <sub>1</sub> |
|--------------------|----------------|----------------|----------------|----------------|
|                    | HF             |                | CAM-B3LYP      |                |
| FC                 | -641.398504    | -641.256916    | -644.958011    | -644.846930    |
| $\text{MECI}_{Ph}$ | -641.278669    | -641.278664    | -644.830087    | -644.830083    |
| $\text{MECI}_{Im}$ | -641.299331    | -641.299330    | -644.849232    | -644.849200    |

  

|                    | M06-2X         |                | BH&HLYP        |                |
|--------------------|----------------|----------------|----------------|----------------|
|                    | S <sub>0</sub> | S <sub>1</sub> | S <sub>0</sub> | S <sub>1</sub> |
| FC                 | -645.017015    | -644.903551    | -644.898242    | -644.784381    |
| $\text{MECI}_{Ph}$ | -644.871432    | -644.871412    | -644.773107    | -644.773094    |
| $\text{MECI}_{Im}$ | -644.883112    | -644.883084    | -644.788948    | -644.788928    |

## 2 Cartesian coordinates and total energies of ethylene and stilbene obtained using the 6-311G\*\* basis set

Cartesian coordinates and total energies of conical intersections in ethylene and stilbene. The geometries at conical intersections were optimized by the SI-SA-REKS/BH&HLYP method. The ground state equilibrium geometries were optimized by the REKS/BH&HLYP and the total energies at Franck-Condon points were calculated by the SI-SA-REKS/BH&HLYP method. All calculations reported in this section employ the 6-311G\*\* basis set.

Table 17: Cartesian coordinates (Å) of MECIs in C<sub>2</sub>H<sub>4</sub>.

|   | twisted-pyramidalized MECI |           |           | ethylidene MECI |           |           |
|---|----------------------------|-----------|-----------|-----------------|-----------|-----------|
|   | X                          | Y         | Z         | X               | Y         | Z         |
| C | 0.025336                   | -0.470871 | 0.728637  | 0.005410        | -0.048119 | -0.000395 |
| C | -0.205102                  | -0.036602 | -0.554744 | -0.000151       | 0.014408  | 1.452711  |
| H | -0.148920                  | 1.008391  | -0.902373 | 1.025140        | -0.020213 | 1.831361  |
| H | 1.044934                   | 0.046157  | 0.601632  | -0.459237       | 0.929634  | 1.830993  |
| H | -0.340180                  | 0.112753  | 1.567130  | 0.706302        | -0.110984 | -0.807215 |
| H | -0.306501                  | -0.724690 | -1.395197 | -0.545302       | -0.819841 | 1.898384  |

Table 18: Total energies (a.u.) and relative energies (eV) of the Franck-Condon point and MECIs of C<sub>2</sub>H<sub>4</sub>.

|             | S <sub>0</sub> | S <sub>1</sub> | ΔE(S <sub>0</sub> ) | ΔE(S <sub>1</sub> ) |
|-------------|----------------|----------------|---------------------|---------------------|
| FC          | -78.553132     | -78.255034     | 0.000               | 8.112               |
| tw-pyr MECI | -78.368899     | -78.368831     | 5.013               | 5.015               |
| eth MECI    | -78.405510     | -78.405420     | 4.017               | 4.019               |

Table 19: Cartesian coordinates ( $\text{\AA}$ ) of MECI in stilbene.

| twisted-pyramidalized MECI |           |           |           |
|----------------------------|-----------|-----------|-----------|
|                            | X         | Y         | Z         |
| C                          | 0.900782  | -0.167909 | 0.391671  |
| C                          | 1.753047  | -0.637294 | -0.632764 |
| C                          | 1.291459  | -1.438599 | -1.683505 |
| C                          | 2.160524  | -1.827600 | -2.678019 |
| C                          | 3.492801  | -1.437539 | -2.647992 |
| C                          | 3.969700  | -0.647566 | -1.611287 |
| C                          | 3.106082  | -0.256579 | -0.613336 |
| C                          | -0.458885 | -0.565289 | 0.553301  |
| C                          | -1.577290 | 0.260067  | 1.007881  |
| C                          | -1.842897 | 1.503854  | 0.415199  |
| C                          | -2.928140 | 2.266853  | 0.798267  |
| C                          | -3.783450 | 1.833785  | 1.798997  |
| C                          | -3.523111 | 0.618334  | 2.410729  |
| C                          | -2.450219 | -0.158944 | 2.022563  |
| H                          | 1.381515  | 0.481549  | 1.133255  |
| H                          | 0.260110  | -1.744784 | -1.666010 |
| H                          | 1.794907  | -2.439384 | -3.482975 |
| H                          | 4.159780  | -1.766766 | -3.426931 |
| H                          | 5.000652  | -0.349518 | -1.574213 |
| H                          | 3.465072  | 0.349535  | 0.202823  |
| H                          | -0.026988 | -1.026869 | 1.508900  |
| H                          | -1.207180 | 1.855094  | -0.377008 |
| H                          | -3.099901 | 3.211426  | 0.315500  |
| H                          | -4.629002 | 2.424660  | 2.098154  |
| H                          | -4.174140 | 0.270673  | 3.195967  |
| H                          | -2.275287 | -1.105521 | 2.505100  |

Table 20: Total energies (a.u.) and relative energies (eV) of the Franck-Condon points and MECI of stilbene.

|             | $S_0$       | $S_1$       | $\Delta E(S_0)$ | $\Delta E(S_1)$ |
|-------------|-------------|-------------|-----------------|-----------------|
| trans-FC    | -540.492552 | -540.334363 | 0.000           | 4.305           |
| cis-FC      | -540.485771 | -540.315338 | 0.185           | 4.822           |
| tw-pyr MECI | -540.333370 | -540.333364 | 4.332           | 4.332           |
